# Supplementary material for: Highly sensitive formaldehyde sensors based on polyvinylamine modified polyacrylonitrile nanofibers
Source: Royal Society of Chemistry journal article supplement (doi:10.1039/c3ra44671a), 2013-01-01
Supplement: c3ra44671a.pdf [file c3ra44671a.pdf]

Electronic Supplementary Information

**Highly sensitive formaldehyde sensor based on polyvinylamine  
modified polyacrylonitrile nanofibers**

Wei Huang,<sup>‡a</sup> Xueqin Wang,<sup>‡a</sup> Yongtang Jia,<sup>b</sup> Xiaoqi Li,<sup>a</sup> Zhigao Zhu,<sup>c</sup> Yan Li,<sup>a</sup>

Yang Si,<sup>c</sup> Bin Ding,<sup>\*ac</sup> Xueli Wang,<sup>c</sup> Jianyong Yu<sup>\*c</sup>

<sup>a</sup> College of Textiles, Donghua University, Shanghai 201620, China. E-mail:

binding@dhu.edu.cn

<sup>b</sup> College of Textiles and Clothing, Wuyi University, Jiangmen, Guangdong 529020, China

<sup>c</sup> Nanomaterials Research Center, Modern Textile Institute, Donghua University, Shanghai

200051, China. E-mail: yujy@dhu.edu.cn

‡ These authors have contributed equally to this work.

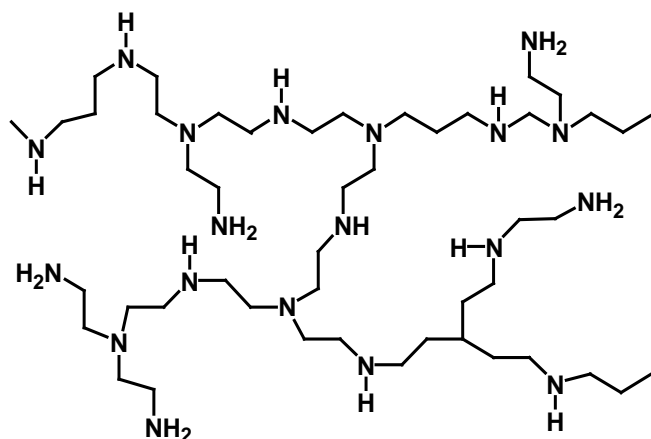

Fig. S1 The molecular geometry of PEI molecule.

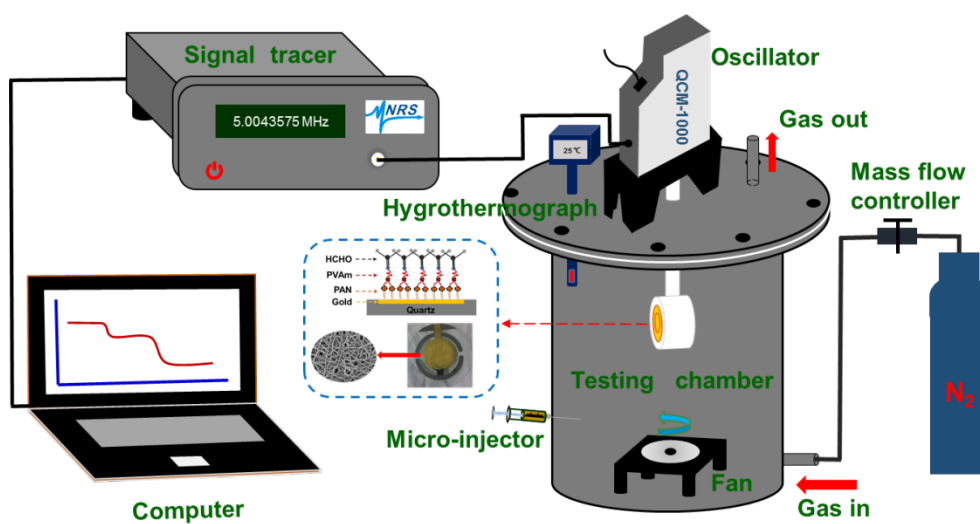

Fig. S2 Schematic diagram of a gas testing system for formaldehyde monitoring.
